# Supplementary figures and images for: Hierarchical mesoporous iron-based fluoride with partially hollow structure: facile preparation and high performance as cathode material for rechargeable lithium ion batteries
Source: Royal Society of Chemistry journal article supplement (doi:10.1039/c4cp00568f), 2014-01-01

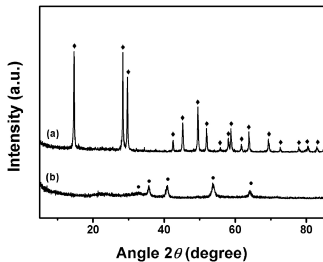

Supplement: c4cp00568f4.pdf [file c4cp00568f4.pdf]

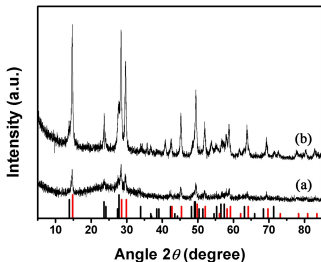

Supplement: c4cp00568f6.pdf [file c4cp00568f6.pdf]

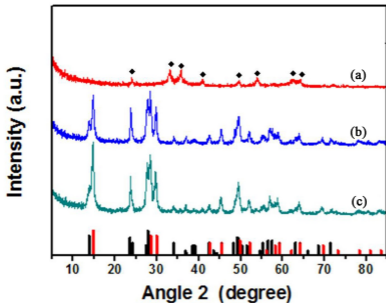

Supplement: c4cp00568f7.pdf [file c4cp00568f7.pdf]

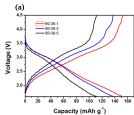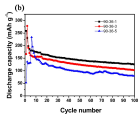

Supplement: c4cp00568f9.pdf [file c4cp00568f9.pdf]
